# Supplementary material for: Interface-modulated morphological transition of biodegradable poly(ε-caprolactone) crystals
Source: Royal Society of Chemistry journal article supplement (doi:10.1039/d4lf00073k), 2024-01-01
Supplement: d4lf00073k1.pdf [file d4lf00073k1.pdf]

## Supporting Information

### Interface-Modulated Morphological Transition of Biodegradable Poly( $\epsilon$ -caprolactone) Crystals

Bingbing Li,<sup>a\*</sup> and Alan R. Esker<sup>b</sup>

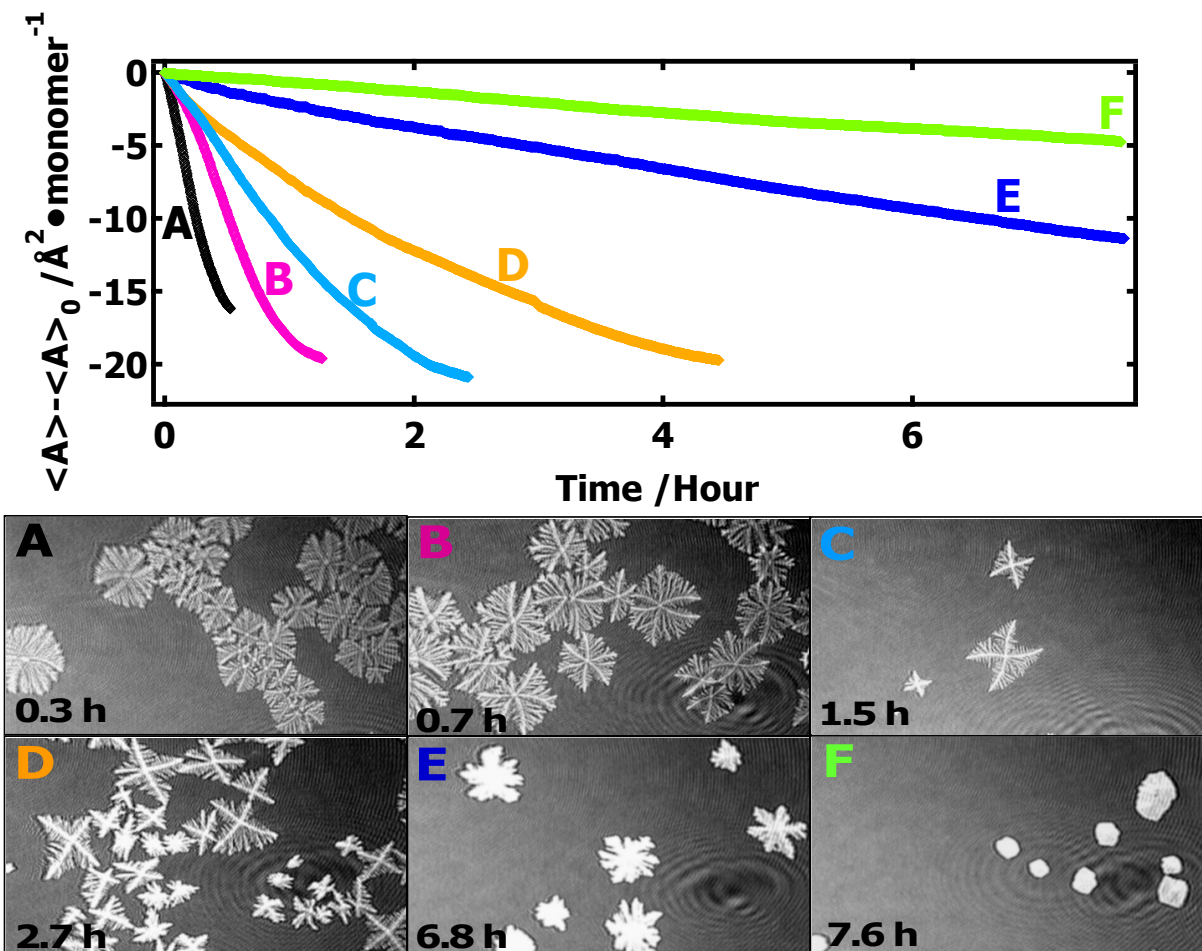

**Figure S1.** BAM images for  $X_{\text{PtBA}} \sim 0.14$  PCL/PtBA blends at 22.5 °C obtained during isobaric area relaxation experiments. Experiments were performed at ( $\Pi / \text{mN} \cdot \text{m}^{-1}$ ): (A) 11, (B) 10.5; (C) 10.3, (D) 10, (E) 9.5, and (F) 8.5. BAM images were taken at  $\langle A \rangle \sim 8\text{-}10 \text{\AA}^2 \cdot \text{monomer}^{-1}$  and also represent different crystallization time (time/hour): (A) 0.3, (B) 0.7; (C) 1.5, (D) 2.7, (E) 6.8, and (F) 7.6. Solid-like domains appear bright in all of the  $4.8 \times 2.6 \text{ mm}^2$  BAM images.

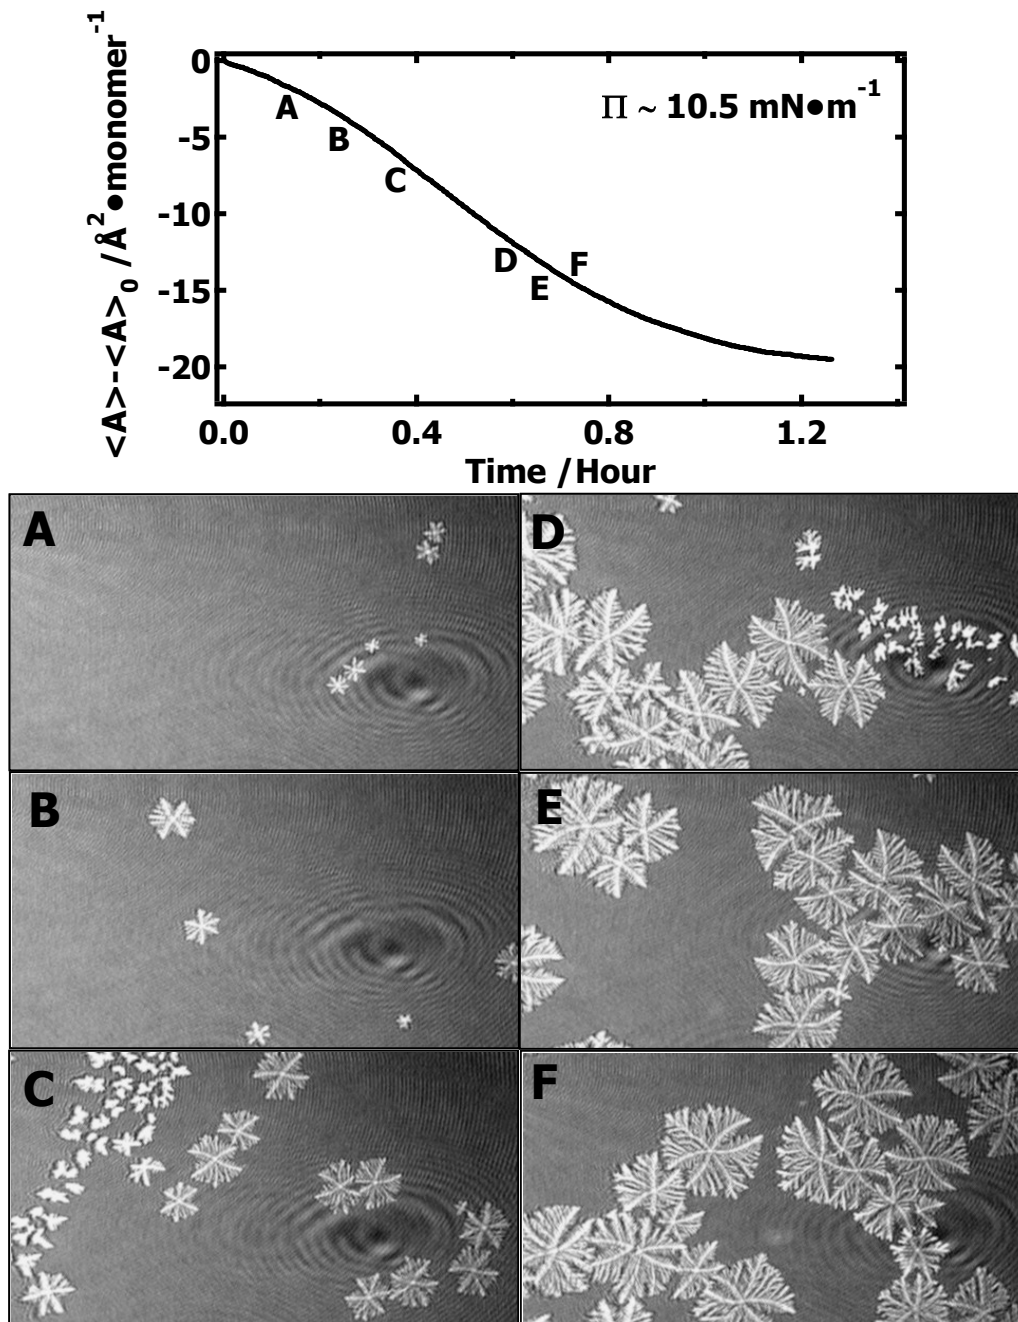

**Figure S2.** BAM images for a PCL/PtBA blend of XPtBA  $\sim 0.14$  obtained during an isobaric area relaxation experiment at  $\Pi \sim 10.5 \text{ mN} \cdot \text{m}^{-1}$ . BAM images were taken during isobaric experiments at (Time /hour): (A) 0.14, (B) 0.25, (C) 0.37, (D) 0.59, (E) 0.66 and (F) 0.70. Solid-like domains appear bright in all of the  $4.8 \times 2.6 \text{ mm}^2$  BAM images.

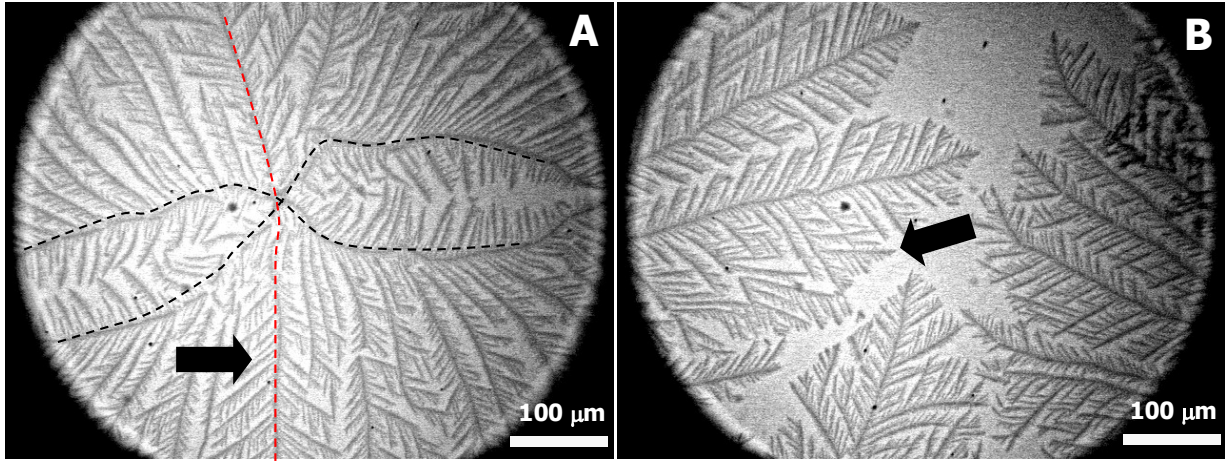

**Figure S3.** OM images of a single layer LS-film for a  $X_{PtBA} \sim 0.14$  PCL/PtBA blend. The LS films were transferred onto PS coated silicon substrates at  $\langle A \rangle \sim 5 \text{ \AA}^2 \cdot \text{monomer}^{-1}$  during an isobaric area relaxation experiment at  $\Pi \sim 11 \text{ mN} \cdot \text{m}^{-1}$ : (A) Symmetric dendritic branching, a “winning” branch is indicated by the arrow; and (B) Detailed features of dendritic tips. A dendritic tip is indicated by the arrow.

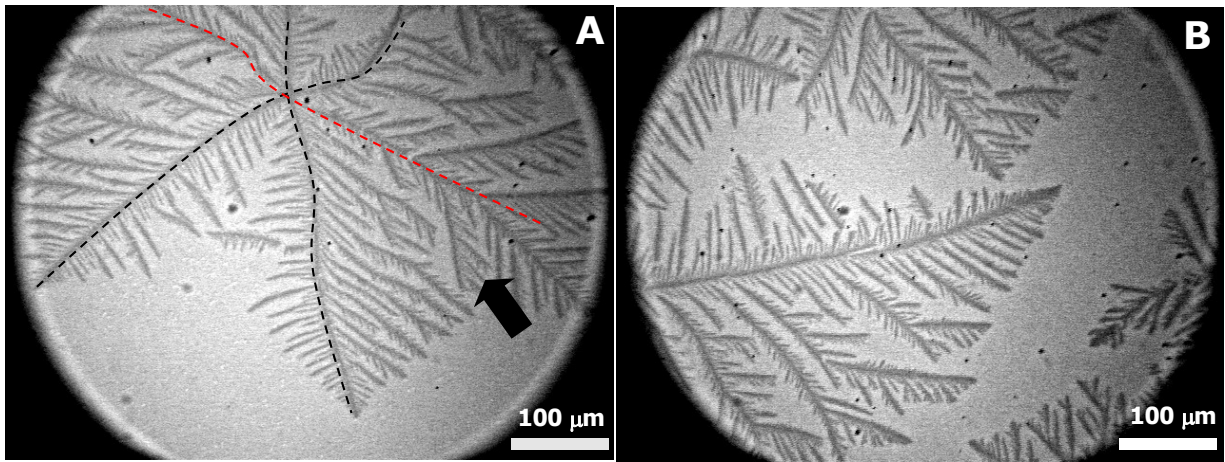

**Figure S4.** OM images of a single layer LS-film for a  $X_{PtBA} \sim 0.14$  PCL/PtBA blend. The LS films were transferred onto PS coated silicon substrates at  $\langle A \rangle \sim 5 \text{ \AA}^2 \cdot \text{monomer}^{-1}$  during an isobaric area relaxation experiment at  $\Pi \sim 10.5 \text{ mN} \cdot \text{m}^{-1}$ : (A) Symmetric dendritic branching, a “winning” branch is indicated by the arrow; and (B) Detailed features of a dendritic tip.

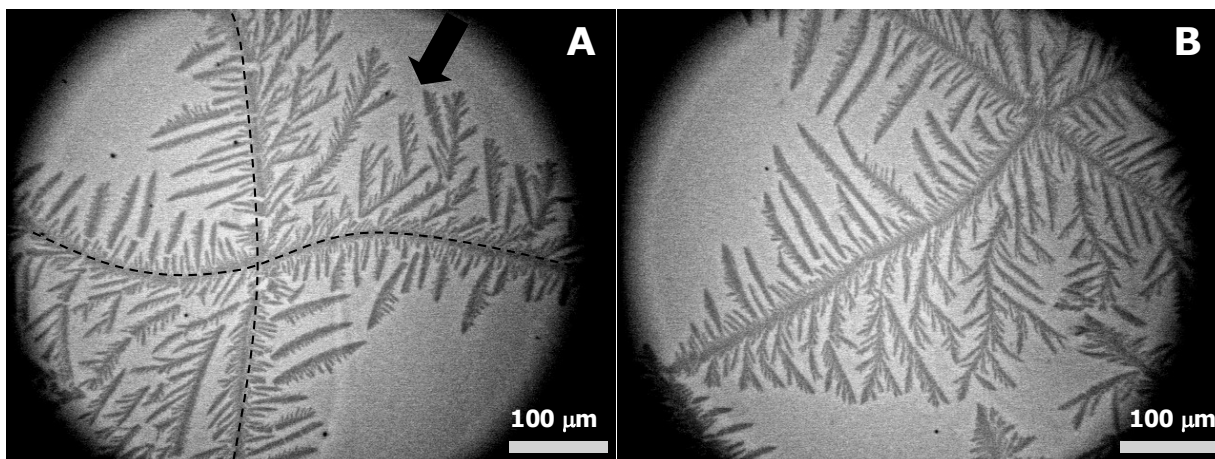

**Figure S5.** OM images of a single layer LS-film for a  $X_{\text{PtBA}} \sim 0.14$  PCL/PtBA blend. The LS films were transferred onto PS coated silicon substrates at  $\langle A \rangle \sim 5 \text{ \AA}^2 \cdot \text{monomer}^{-1}$  during an isobaric area relaxation experiment at  $\Pi \sim 10.3 \text{ mN} \cdot \text{m}^{-1}$ : (A) Dendritic branches in one  $\{100\}$  sector are indicated by the arrow; and (B) Detailed features of a dendritic tip.

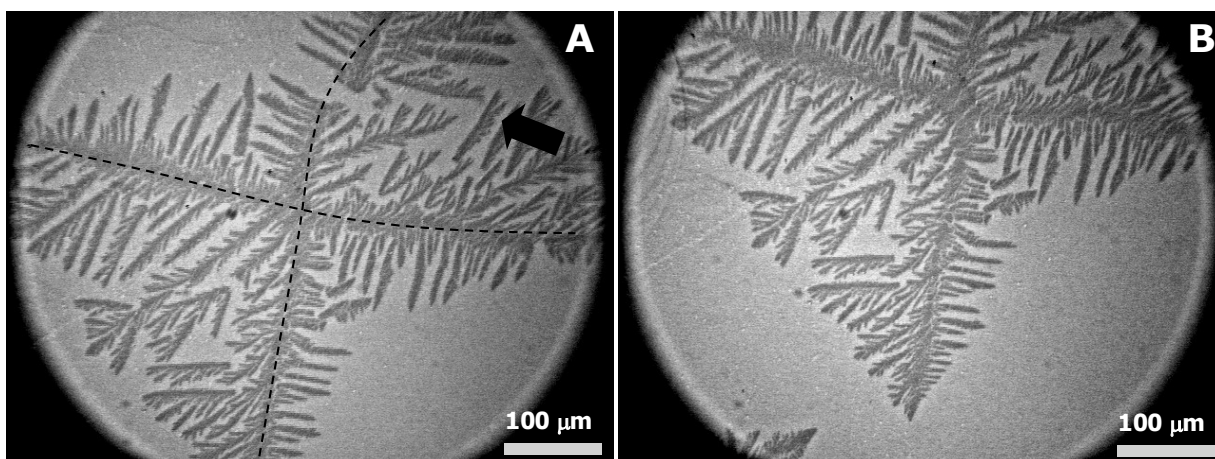

**Figure S6.** OM images of a single layer LS-film for a  $X_{\text{PtBA}} \sim 0.14$  PCL/PtBA blend. The LS films were transferred onto PS coated silicon substrates at  $\langle A \rangle \sim 5 \text{ \AA}^2 \cdot \text{monomer}^{-1}$  during an isobaric area relaxation experiment at  $\Pi \sim 10 \text{ mN} \cdot \text{m}^{-1}$ : (A) Symmetric dendritic branching, dendritic branches in one  $\{100\}$  sector are indicated by the arrow; and (B) Detailed features of a dendritic tip.

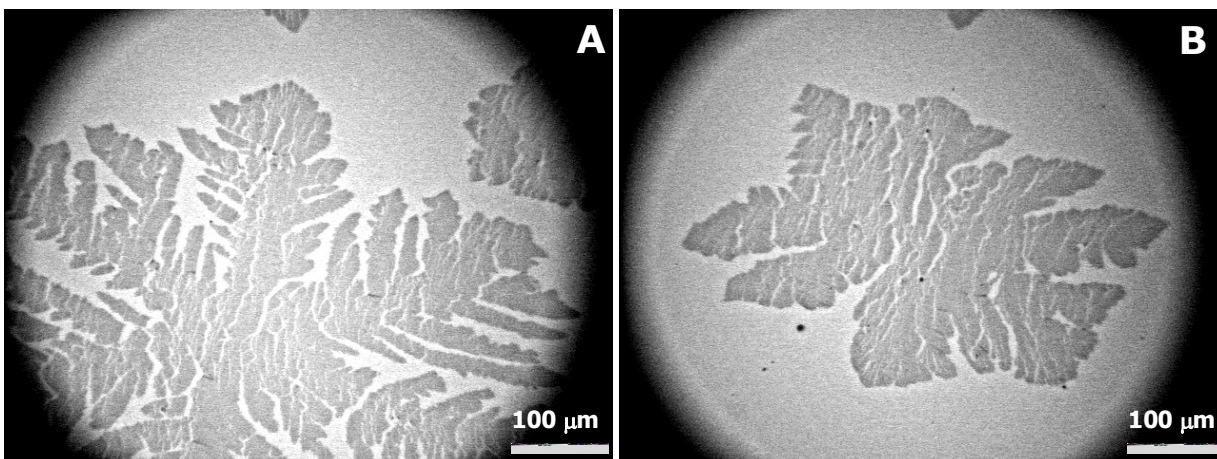

**Figure S7.** OM images of a single layer LS-film for a  $X_{\text{PtBA}} \sim 0.14$  PCL/PtBA blend. The LS films were transferred onto PS coated silicon substrates at  $\langle A \rangle \sim 5 \text{ \AA}^2 \cdot \text{monomer}^{-1}$  during an isobaric area relaxation experiment at  $\Pi \sim 9.5 \cdot \text{m}^{-1}$ . Both (A) and (B) show fat dendritic fingers.

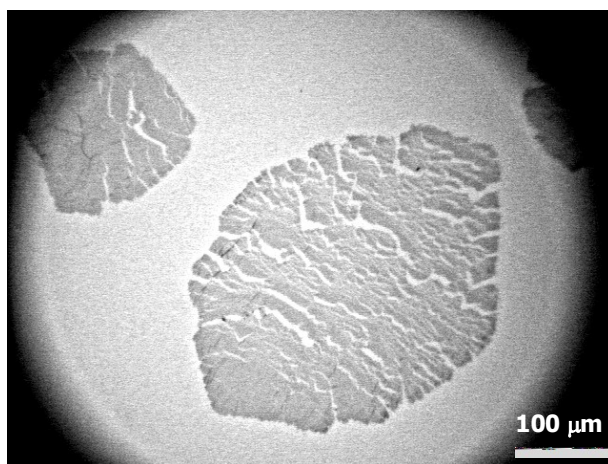

**Figure S8.** OM image of a single layer LS-film for a  $X_{\text{PtBA}} \sim 0.14$  PCL/PtBA blend. The LS film was transferred onto a PS coated silicon substrates at  $\langle A \rangle \sim 8 \text{ \AA}^2 \cdot \text{monomer}^{-1}$  during an isobaric area relaxation experiment at  $\Pi \sim 8.5 \text{ mN} \cdot \text{m}^{-1}$ .
